1 **A three-years assessment of *Ixodes ricinus*-borne pathogens in a French peri-**  
2 **urban forest**

3

4 **Emilie Lejal<sup>1</sup>, Maud Marsot<sup>2</sup>, Karine Chalvet-Monfray<sup>3</sup>, Jean-François Cosson<sup>1</sup>, Sara**  
5 **Moutailler<sup>1</sup>, Muriel Vayssier-Taussat<sup>4</sup> and Thomas Pollet<sup>1\*</sup>**

6

7 <sup>1</sup>UMR BIPAR, Animal Health Laboratory, INRA, ANSES, Ecole Nationale Vétérinaire d'Alfort,  
8 Université Paris-Est, Maisons-Alfort, France.

9 <sup>2</sup>ANSES, University Paris Est, Laboratory for Animal Health, Epidemiology Unit, Maisons-Alfort,  
10 France.

11 <sup>3</sup>Université Clermont Auvergne, Université de Lyon, INRA, VetAgro Sup, UMR EPIA, 63122  
12 Saint-Genès-Champanelle, France.

13 <sup>4</sup>INRA, Animal health department, Nouzilly, France.

14

15 \*Correspondence: [thomas.pollet@vet-alfort.fr](mailto:thomas.pollet@vet-alfort.fr)

## 16 Abstract

17 **Background:** *Ixodes ricinus* is the predominant tick species in Europe and the primary  
18 pathogen vector for both humans and animals. These ticks are frequently involved in the  
19 transmission of *Borrelia burgdorferi* sensu lato, the causative agents of Lyme borreliosis. While  
20 much more is known about *I. ricinus* tick-borne pathogen composition, information about  
21 temporal tick-borne pathogen patterns remain scarce. These data are crucial for predicting  
22 seasonal/annual patterns which could improve understanding and prevent tick-borne  
23 diseases.

24 **Methods:** We examined tick-borne pathogen (TBPs) dynamics in *I. ricinus* collected monthly in  
25 a peri-urban forest over three consecutive years. In total, 998 nymphs were screened for 31  
26 pathogenic species using high-throughput microfluidic real-time PCR.

27 **Results:** We detected DNA from *Anaplasma phagocytophilum* (5.3%), *Rickettsia helvetica*  
28 (4.5%), *Borrelia burgdorferi* s.l. (3.7%), *Borrelia miyamotoi* (1.2%), *Babesia venatorum* (1.5%)  
29 and *Rickettsia felis* (0.1%). Among all analysed ticks, 15.9% were infected by at least one of  
30 these microorganisms, and 1.3% were co-infected. Co-infections with *B. afzeli*/*B. garinii* and  
31 *B. garinii*/*B. spielmanii* were significantly over-represented. Moreover, significant variations in  
32 seasonal and/or inter-annual prevalence were observed for several pathogens (*R. helvetica*,  
33 *B. burgdorferi* s.l., *B. miyamotoi*, and *A. phagocytophilum*).

34 **Conclusions:** Analysing TBPs prevalence in monthly sampled tick over three years allowed us  
35 to assess seasonal and inter-annual fluctuations of the prevalence of TBPs known to circulate  
36 in the sampled area, but also to punctually detect less common species. All these data  
37 emphasize that sporadic tick samplings are not sufficient to determine TBPs prevalence and  
38 that regular monitoring is necessary.

39 **Key words:** Tick-borne pathogens, dynamics, temporal patterns, pathogen co-occurrence

40

## 41 Background

42 Ticks are obligatory hematophagous arthropods and consequently, are one of the most  
43 important pathogen vectors [1–3]. Lyme borreliosis (LB) is the most commonly reported tick-

44 borne disease (TBD) in the northern hemisphere and is caused by bacteria belonging to the  
45 *Borrelia burgdorferi* s.l. complex. In Western Europe, *Ixodes ricinus* is known to be involved in  
46 the transmission of these bacteria to both humans and animals. This tick species has also been  
47 reported to be a vector for many other tick-borne pathogens (TBP) with potentially significant  
48 consequences for human and animal health (*Anaplasma*, *Rickettsia*, *Bartonella*, *Babesia*...) [4–  
49 9].

50 While multiple different pathogens have been identified and confirmed in *I. ricinus*  
51 ticks, very little is known about their seasonal and inter-annual variations. Time-series studies  
52 are thus crucial to understanding natural variability in microbial communities over time. Over  
53 the last decade, only a handful of surveys have assessed seasonal and monthly TBP variation  
54 patterns [10–14]. Although these results have heightened our general understanding of TBP  
55 dynamics, several of these studies were performed over short periods of less than two years,  
56 rendering it impossible to infer inter-annual discrepancies or to detect bias due to a  
57 particularly exceptional year. Only Coipan *et al.* [12] analysed several pathogenic genera in  
58 ticks sampled over more than two years. This study did demonstrate relationships between  
59 seasons and TBP prevalence (*Borrelia*, *Rickettsia*, *Anaplasma*, *Neoehrlichia*, and *Babesia*) in  
60 questing tick populations. These variations were mainly attributed to the varying availability  
61 of reservoir hosts.

62 Tick density is also heavily influenced by the presence of suitable hosts, most notably  
63 wild ungulates that sustain adults, thus enabling tick population renewal [15,16]. However, it's  
64 important to emphasise that immediate tick survival and questing activities are highly  
65 dependent on suitable and specific environmental conditions (temperatures between 8 to  
66 24°C; and up to 80% humidity). Simultaneously, several studies have investigated whether  
67 pathogen presence influences tick behaviour. Herrmann and Gern [17,18] suggested that  
68 *I. ricinus* infected with *B. burgdorferi* s.l. can tolerate increased levels of desiccation, and  
69 Neelakanta *et al.* [19] demonstrated that *I. scapularis* infected with  
70 *Anaplasma phagocytophilum* are more resistant to cold. The presence of these TBP could  
71 therefore enhance survival or questing activities of the infected ticks under challenging abiotic  
72 conditions, suggesting the existence of a potential link between pathogen prevalence in  
73 questing ticks and seasons.

74 Tick density and TBP prevalence can thus be influenced by several variables, and can  
75 therefore potentially fluctuate both seasonally and annually. Studying these dynamics is  
76 essential to better understanding and anticipating TBP risk.

77 Peri-urban forests containing both TBP-reservoir hosts and ticks, and which are highly  
78 frequented by people and their pets, represent a particularly interesting area to study tick and  
79 TBP dynamics. The Sénart forest, located to the south of Paris, harbours many large ungulates  
80 and abundant and diverse populations of other TBP reservoir hosts (bank voles, wood mice,  
81 Siberian chipmunks, roe deer, hedgehogs, ...), and accommodates more than three million  
82 visitors every year. This forest is therefore particularly adapted to studying ticks and tick-borne  
83 pathogen dynamics.

84 In this study, we assessed the seasonal and inter-annual variability of *I. ricinus*-borne  
85 pathogens in the Sénart forest over three consecutive years (from April 2014 to May 2017),  
86 and determined whether any significant associations existed between these pathogens. We  
87 investigated a total of 31 pathogenic species (bacteria and parasites), belonging to 11 genera:  
88 *Borrelia*, *Anaplasma*, *Ehrlichia*, *Neoehrlichia* (only *Neoehrlichia mikurensis*), *Rickettsia*,  
89 *Bartonella*, *Francisella*, *Coxiella*, *Theileria*, *Babesia*, and *Hepatozoon*.

90

## 91 **Methods**

### 92 **Tick collection**

93 *I. ricinus*, nymphs and adults, were monthly collected during three years, from April  
94 2014 to May 2017, in the Sénart forest in the south of Paris. Ticks were collected between 10  
95 am and noon. Samplings were performed by dragging (Vassallo *et al.*, 2000) on 10 transects of  
96 10 square meters, localized on the parcel 96 (48°39'34.6"N 2°29'13.0"E, **Figure 1**). Dragging  
97 was always performed 3 consecutive times on each transect by the same persons to limit  
98 sampling bias. The presence of *Dermacentor* spp. was occasionally reported but no  
99 investigation has been led further. The presence of *I. ricinus* larvae was also sometimes  
100 noticed. Their small size making their individual DNA extraction and analysis difficult, we chose  
101 to not collect them. After morphological identification, ticks were stored at -80°C. In total 1167  
102 ticks were collected.

### 103 **Tick washing, crushing and DNA extraction**

104 Ticks were first washed once in ethanol 70% for 5 minutes and rinsed twice in sterile  
105 MilliQ water for 5 minutes. Ticks were then individually crushed in 375µL of Dulbecco's  
106 Modified Eagle Medium (DMEM) with decomplemented Foetal Calf Serum (10%) and six steel  
107 beads using the homogenizer Precellys®24 Dual (Bertin, France) at 5500 rpm for 20 seconds.

108 DNA extractions were then performed on 100µL of tick crushing, using the DNA  
109 extraction kit NucleoSpin® Tissue (Macherey-Nagel, Germany), and following the standard  
110 protocol for human or animal tissue and cultured cells, from the step 2. DNA extracts were  
111 eluted in 50µL of elution buffer and then stored at -20°C until further use.

112 Two controls were performed: (1) the crushing control, corresponding to a DMEM tube  
113 in which crushing and DNA extraction were performed in the same conditions than on  
114 samples; and (2) the extraction control, corresponding to the DNA extraction step without tick  
115 samples.

116

### 117 **Tick-borne pathogens detection**

118 A high-throughput screening of the most common bacterial and parasitic species  
119 known to circulate in ticks in Europe was performed. This allowed us to detect simultaneously  
120 the presence of 31 pathogenic species, 7 genera and 1 phylum: the Borrelia genus and eight  
121 Borrelia species (*B. burgdorferi* s.s., *B. afzelii*, *B. garinii*, *B. valaisiana*, *B. spielmanii*,  
122 *B. lusitaniae*, *B. bissettii* and *B. miyamotoi*); the Anaplasma genus and five Anaplasma species  
123 (*A. marginale*, *A. phagocytophilum*, *A. platys*, *A. centrale*, *A. bovis*); the Ehrlichia genus and  
124 *E. canis*; *Neoehrlichia mikurensis*; the Rickettsia genus and six Rickettsia species (*R. conorii*,  
125 *R. slovaca*, *R. massiliae*, *R. helvetica*, *R. aeschlimanii* and *R. felis*); the Bartonella genus and  
126 *B. henselae*; *Francisella tularensis*; *Coxiella burnettii*; the apicomplexa phylum and seven  
127 Babesia species (*B. divergens*, *B. microti*, *B. caballi*, *B. canis*, *B. venatorum*, *B. bovis*, *B. ovis*),  
128 but also the two parasitic genus Theileria and Hepatozoon.

129 TBP DNA was detected using the BioMark™ real-time PCR system (Fluidigm, USA), a  
130 microfluidic system allowing to perform 48 or 96 real-time PCR reactions on 48 or 96 different  
131 samples as described in Michelet *et al.* [20] and Moutailler *et al.* [21]. Briefly, each sample and

132 primers/probe set were included in individual wells. A pressure system allowed to load them  
133 on the chip, *via* microchannels, in individual reaction chambers of 10nL, where each sample  
134 will meet individually each primers/probe set.

135

### 136 **Primers and probes**

137 Primers and probes used for this analysis have been developed and validated by  
138 Michelet *et al.* [20] and Gondard *et al.* [22]. They have been designed to specifically amplify  
139 DNA from pathogens (bacteria and parasites) which are usually found in ticks in Europe. Their  
140 sequences, amplicon size, as well as targeted genes and pathogens are presented in the  
141 Additional **table1**. Please note that, due to potential cross-reactions between primer/probe  
142 combination (i.e. design) targeting *B. burgdorferi* s.s. and *B. spielmanii* with respectively  
143 *B. garinii*/*B. valaisiana* and *B. afzelii* DNA [described in 20], positive samples for the two  
144 formers were considered as negative when associated to the latter. Therefore, potential  
145 associations between *B. burgdorferi* s.s./*B. garinii*, *B. burgdorferi* s.s./*B. valaisiana* and  
146 *B. spielmanii*/*B. afzelii* cannot be detected and the co-infection percentage may be under-  
147 estimated.

148

### 149 **DNA pre-amplification**

150 DNA pre-amplifications were performed using the TaqMan PreAmp Master Mix (Applied  
151 Biosystems, France). Basically, the different primer pairs, used for the real time PCR, were  
152 pooled combining equal volume of primers with a final concentration of 0.2µM. For each  
153 sample, 1.25µL of DNA extract was pre-amplified using the Perfecta PreAmp SuperMix reagent  
154 (1x) and the 0.2x pool (0.05µM), in a final reactive volume of 5µL. PCR cycle comprised a first  
155 cycle at 98°C for 2 minutes, followed by 14 cycles with 2 steps, the first one at 95°C for 10  
156 seconds and the second one at 60°C for 3 minutes. Pre-amplified DNA were then diluted (1:10)  
157 by addition of 45µL of sterile deionised water before use.

158

159

## 160 **High throughput real time PCR**

161 For each pre-amplified sample, the BioMark™ real-time PCR system (Fluidigm, USA)  
162 was used for high-throughput microfluidic real-time PCR amplification using the 48.48  
163 microfluidic dynamic array (Fluidigm Corporation, USA). Amplifications were performed using  
164 FAM- and black hole quencher (BHQ1)-labeled TaqMan probes with TaqMan Gene Expression  
165 Master Mix in accordance with manufacturer's instructions (Applied Biosystems, France).  
166 Thermal cycling conditions were used as follows: 95°C for 5 min, 45 cycles at 95°C for 10 s,  
167 60°C for 15 s, and 40°C for 10s. Data were acquired on the BioMark Real-Time PCR system and  
168 analysed using the Fluidigm Real-Time PCR Analysis software to obtain crossing point (CP)  
169 values. Three tick species control (*I. ricinus*, *Dermacentor reticulatus*,  
170 *Dermacentor marginatus*), one negative water control and one positive *Escherichia coli* control  
171 were included in each chip.

172

## 173 **Nested PCR and sequencing**

174 Samples that were positive either only for species design but not for the genus design  
175 or only for the genus design and not for the species design were all re-analysed by nested PCR.  
176 We used primer pairs allowing to target another gene than the one tested into the fluidigm  
177 experiment. Their sequences, amplicon size, as well as targeted genes and pathogen genus are  
178 presented in the Additional **table 2**. Amplicons were then sequenced by the Eurofins company.  
179 Sequences were then analysed using the Bioedit software and compared to the database NCBI  
180 (National Center for Biotechnology Information) by sequence alignment using nucleotide  
181 BLAST (Basic Local Alignment Search Tool).

182

## 183 **Statistical analysis**

### 184 ***TBP prevalences at the seasonal and multi-annual scale***

185 Differences in TBP prevalences were tested within and between years by using a  
186 multivariable logistic regression model. We considered the calendar season level for the  
187 within-year variability. Seasons were considered as following: Winter = December to February;  
188 Spring = March to May; Summer = June to August and Autumn = September to November.

189 Logistic regression models were developed using the TBP status of each nymph as the outcome  
190 measure and season, year and the interaction between season and year as explanatory  
191 variables. We performed four specific models for the following group/species of TBP: (1)  
192 *B. burgdorferi* s.l. (considering *B. burgdorferi* s.s., *B. garinii*, *B. afzelii*, *B. valaisiana* and  
193 *B. spielmanii*), (2) *B. miyamotoi*, (3) *A. phagocytophilum*, and (4) *R. helvetica*. The models were  
194 constructed from a generalized linear model [GLM, 23] using a binomial distribution (logit link).  
195 Model assessment was based on Akaike information criterion (AIC). Results were expressed as  
196 odds ratios (OR) and 95% confidence intervals. Statistical computations were performed in R  
197 3.5.1. [24].

198

### 199 ***Statistical modelling of tick-borne pathogen associations***

200 We tested the associations between the TBP species that belonged to the co-infection  
201 profiles of nymphs found in this study. We used the association screening approach [25]. For  
202 a given number of pathogen species tested (NP), the number of possible combination (NC)  
203 was calculated as  $NC = 2^{NP}$ . Assuming similar pathogen prevalence as those observed, a  
204 simulated dataset was built as an absence/presence matrix with hosts in lines and pathogen  
205 combinations in columns. With 5 000 simulations, we obtained the NC statistic distributions.  
206 We estimated a 95% confidence interval to obtain a profile that includes simultaneously all the  
207 combinations. From this profile, we inferred for each combination two quantiles, *Qinf* and  
208 *Qsup*. A global test was based on the 95% confidence envelope. When H0 was rejected, the  
209 local tests were based on the NC confidence intervals: [*Qinf* ; *Qsup*][25].

210

## 211 **Results**

### 212 **Tick temporal dynamics**

213 From April 2014 to May 2017, a total of 1167 *Ixodes ricinus* ticks were collected in the  
214 Sénart forest in the south of Paris (**Figure 1**). Please note that May and June 2016 were  
215 unfortunately not sampled due to logistic issues. Collected ticks were composed of 1098  
216 nymphs, 35 females and 34 males. Adults were sporadically detected all over the three years  
217 Due to their low total abundance (more than 10 fold less compared with nymphs), we decided



218 to focus our temporal analysis on nymphs. The temporal dynamics of nymph densities over  
219 the three years is shown in **Figure 2**. Nymph densities followed similar patterns from one year  
220 to another, with a main peak of activity observed every year in spring, a strong decrease during  
221 summer and a second peak, smaller, observed in Autumn (**Figure 2**). In January and February,  
222 the average densities were less than 10 questing nymphs/100m<sup>2</sup>. A clear rise was observed  
223 from March to May reaching an average peak of 95 nymphs/100m<sup>2</sup> in May. We then observed  
224 a decrease in summer up to a minimum average of 5 nymphs/100m<sup>2</sup> in September. The nymph  
225 densities increased slightly in October to reach an average of 13 nymphs/100m<sup>2</sup>, before finally  
226 decreasing in November (2 nymphs/100m<sup>2</sup>, sampled in 2015).

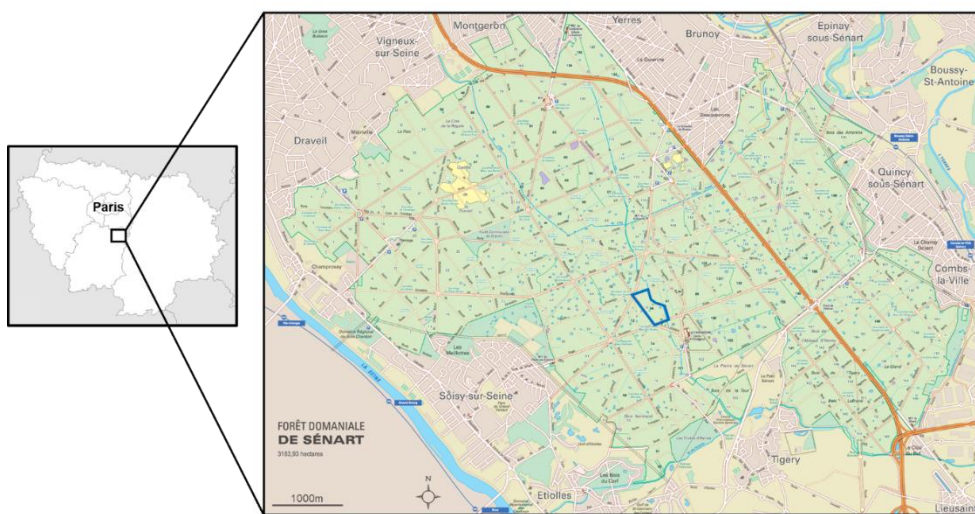

228 **Figure 1. Sénart forest, location and parcel map. Sampling was made on the blue framed parcel.**

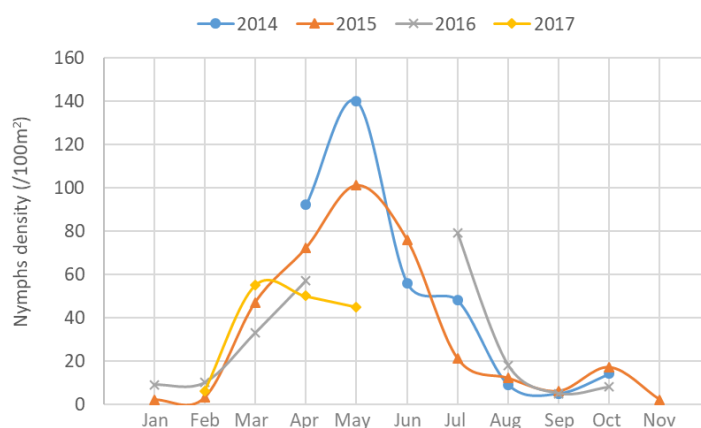

230 **Figure 2. *Ixodes ricinus* nymphs monthly density (/100m<sup>2</sup>) in 2014, 2015, 2016 and 2017.** Ticks were  
231 sampled from April 2014 to May 2017. Please note that May and June 2016 were unfortunately not  
232 sampled.

233

## 234 **Detected pathogens and their prevalence in tick population**

235 Due to technical problems, DNA was extracted and analysed only from 1044 nymphs  
236 among the 1098 previously mentioned. 46 were negative for at least one positive control and  
237 thus have been removed from the analysis. From the 998 remaining DNA samples, 15.9%  
238 [13.7%, 18.3%] were positive for at least one tested pathogen, which belong to three bacterial  
239 and one protozoan genera: *Anaplasma*, *Borrelia*, *Rickettsia* and *Babesia* (**Table 1**).

240 Pathogens belonging to the *Anaplasma* genus were detected in 5.4% [4.1%, 7.0%] of  
241 collected ticks. Most of them were positive for *Anaplasma phagocytophilum* (5.3% of all the  
242 samples) and one DNA sample was only positive for the primers/probe combination specific  
243 to *Anaplasma* spp.. This sample was confirmed by nested PCR and the amplicon was then  
244 sequenced. The BLAST analysis on NCBI showed that this sequence matched at 99% of identity  
245 with four different *Anaplasma* species (*A. phagocytophilum*, *A. marginale*, *A. ovis* and  
246 *A. centrale*). Therefore, this sample was only considered as positive for *Anaplasma* spp..

247 Two species of *Rickettsia* were detected in questing *I. ricinus* nymphs.  
248 *Rickettsia helvetica* was the most prevalent and was detected in 4.5% [3.3%, 6.0%] of nymphs.  
249 *Rickettsia felis* was detected in only one nymph (0.1% [.003%, 0.6%]). The presence of *R. felis*  
250 DNA was confirmed by nested PCR and sequencing of the *ompB* gene. The obtained sequence  
251 (GenBank accession number MN267050) matched with the corresponding gene sequence of  
252 *R. felis* (GenBank accession numbers GU182892.1) with 100% of identity and 100% of query  
253 cover.

254 The genus *Borrelia* was represented by six different species detected in 4.9% [3.7%,  
255 6.4%] of the surveyed nymphs. Five belonged to the LB group (3.7% [3.7%, 6.4%]), including  
256 *B. burgdorferi* s.s. (1.5% [0.8%, 2.5%]), *B. garinii* (1.1% [0.6%, 2.0%]), *B. afzelii* (1.1% [0.6%,  
257 2.0%]), *B. valaisiana* (0.6% [0.2%, 1.3%]) and *B. spielmanii* (0.4% [0.1%, 1.0%]). DNA of  
258 *Borrelia miyamotoi*, belonging to the relapsing fever group, was detected in 1.2% [0.6%, 2.1%]  
259 of the collected nymphs.

260 DNA from two species of *Babesia* were detected in questing nymph with the  
261 microfluidic PCR: *Babesia venatorum* (1.5% [0.8%, 2.5%] of ticks) and *Babesia divergens* (0.1%  
262 [0.003%, 0.6%]), detected in one tick). A deeper investigation of the *B. divergens* positive



## 270 **Temporal patterns of TBP in *Ixodes ricinus* nymphs**

### 271 ***TBP prevalence at the monthly scale***

272 In the following paragraph and corresponding figures, prevalences are those obtained  
273 for months with at least nine collected ticks.

274 Global infection rates fluctuated from 8% [3.3%, 15.7%] in May 2015 to 29.6% [18.0%,  
275 43.6%] in June 2014 (**Figure 3**). At the genus level, variations in TBP prevalences and the  
276 number of months for which at least one tick was positive for each tested TBP are presented  
277 in **Figure 4** and **Table 1**.

278 DNA from pathogens belonging to both genera *Rickettsia* and *Anaplasma* were  
279 detected respectively in 16 and 14 of the 30 sampled months respectively. When detected,  
280 prevalences fluctuated from 1.3% [0.03%, 6.9%] (June 2015) to 18.5% [9.3%, 31.4%] (June  
281 2014) for *Rickettsia* and from 1.1% [0.03%, 6.2%] (May 2015) to 15.8% [6.0%, 31.3%] (July  
282 2014) for *Anaplasma*. Both genera are mainly represented by one species: *R. helvetica* and  
283 *A. phagocytophilum* that are the most frequently detected species (16 and 14 /30 months  
284 respectively). These two species were found each year.

285 DNA from members of the *Borrelia* genus was detected in 23 of the 30 sampled  
286 months. This bacterial genus displayed the highest variability with prevalences fluctuating  
287 from 1.1% [0.03%, 6.2%] (May 2015) to 23.5% [6.8%, 49.9%] (October 2015). DNA from  
288 members of the LB group was detected in 18 of the 30 sampled months with prevalences  
289 ranging from 0.8% [0.03%, 6.2%] in May 2014 to 23.5% [6.8%, 49.9%] in October 2015. The  
290 most frequently identified species were *B. burgdorferi* s.s. (8 / 30 sampled months), *B. afzelii*  
291 (8 / 30) and *B. garinii* (7 / 30). DNA from these species was regularly detected over the three  
292 studied years. Conversely, *B. valaisiana* (6 / 30) and *B. spielmanii* (4 / 30) DNA was not  
293 detected during 11 (from April 2015 to March 2016) and 9 (from July 2015 to April 2016)  
294 consecutive months respectively. *Borrelia miyamotoi* (relapsing fever group) DNA was  
295 detected 9 times over the 30 sampled months with prevalences ranging from 0.8% [0.02%,  
296 4.3%] in May 2014 to 7% [1.5%, 19.1%] in March 2015.

297 For parasites, DNA from the genus *Babesia* was detected in 9 months out of 30 sampled  
298 months. Prevalences presented the lowest variability ranging from 1.1% [0.03%, 6.1%] in April  
299 2014 to 3.8% [0.5%, 13.0%] in March 2017 (**Figure 4**). The main detected species was

300 *B. venatorum* that was detected 9 times over 30 samplings and not detected during 9  
301 consecutive sampled months, from June 2015 to April 2016.

302

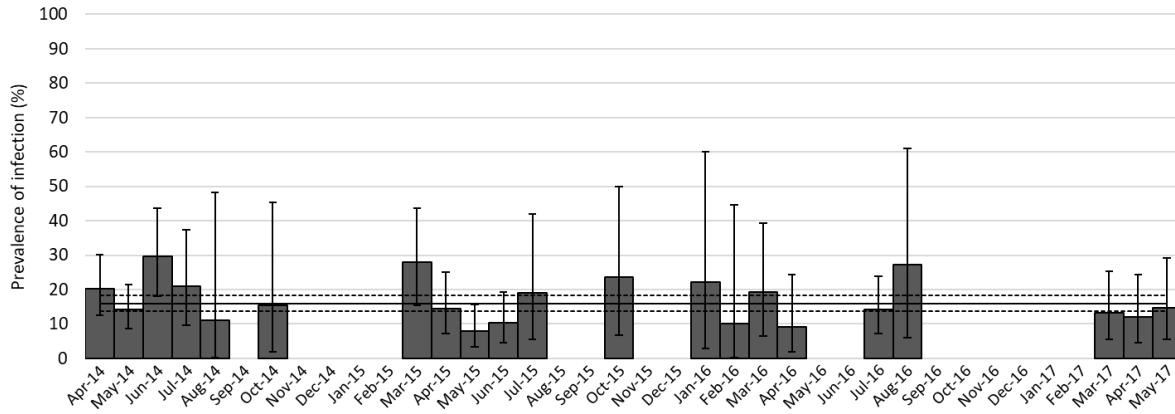

303

304 **Figure 3. Nymph infection rate per month for at least one tested pathogen.** Months with less than  
305 nine nymphs sampled have not been considered for percentage calculation. Error bars represent  
306 confidence intervals of the percentage.

307

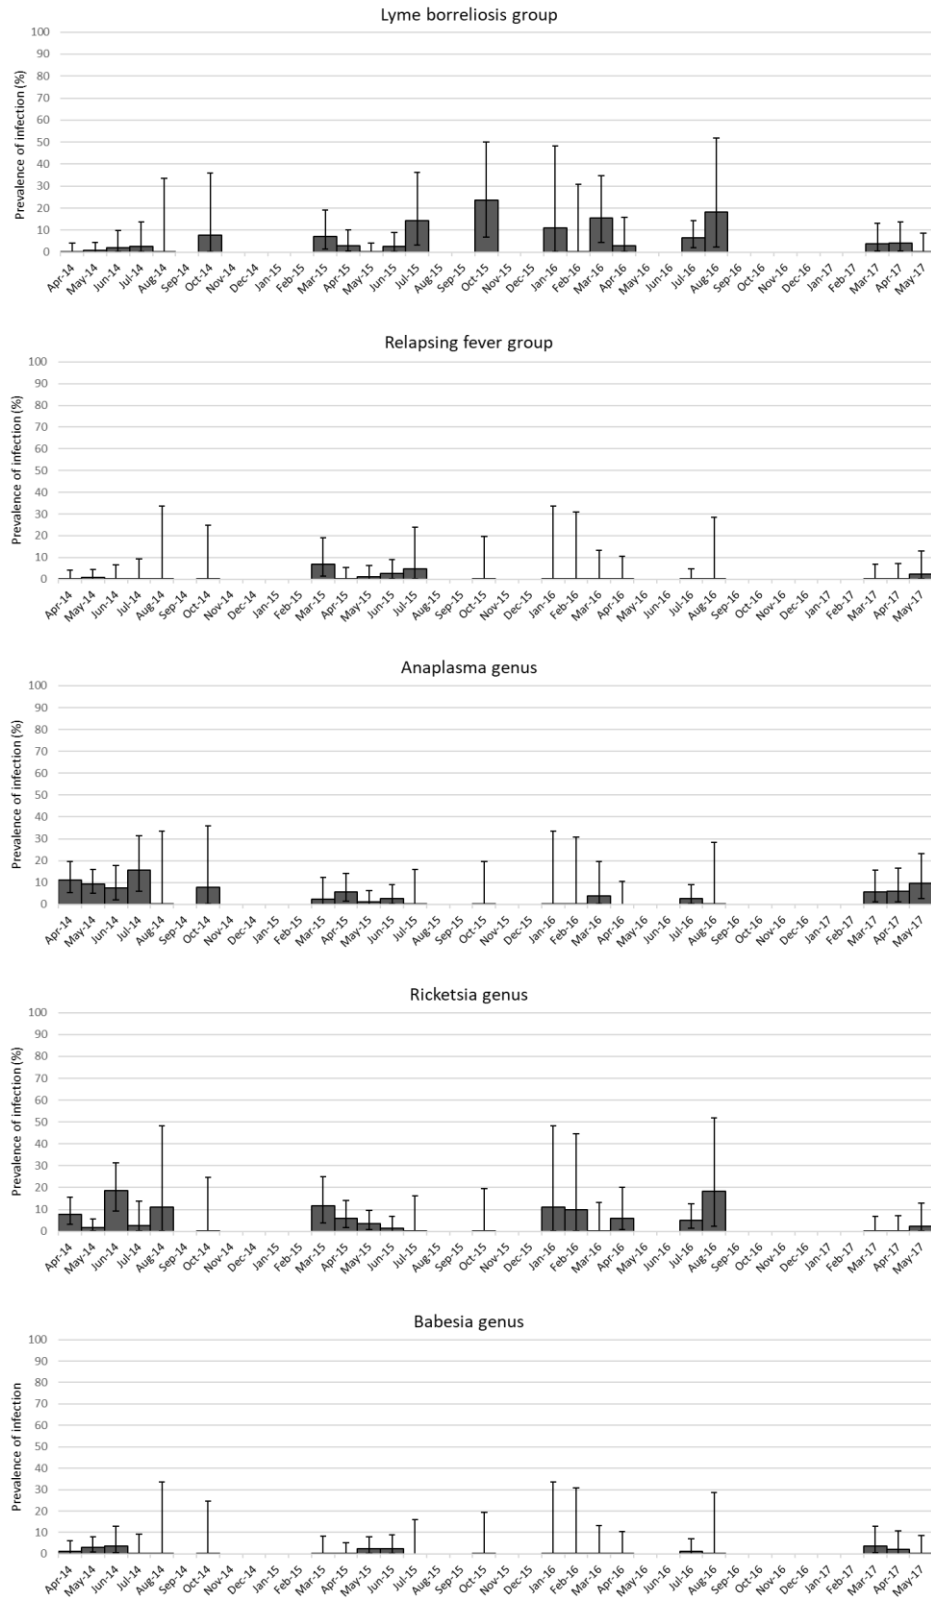

308

309 **Figure 4. Nymph infection rate and confidence intervals per month for the different TBP. Months with**  
310 **less than nine nymphs sampled have not been considered. Error bars represent confidence intervals of**  
311 **the percentage.**

312 **TBP prevalences at the seasonal and multi-annual scale**

313 In order to determine if the prevalence of TBP was different within and between years,  
 314 a multivariable logistic regression model was performed. The spring season and the year 2014  
 315 have been considered as references for the seasonal and yearly effect respectively. Because  
 316 some TBPs had too low prevalences in the nymph population (producing unreliable statistics),  
 317 analyses were only performed on the most prevalent TBPs: *A. phagocytophilum*, *R. helvetica*,  
 318 *B. burgdorferi* s.l., *B. miyamotoi* and *B. venatorum*.

319 Significant differences were observed at the seasonal scale (**Figure 5, Table 2**) for  
 320 *R. helvetica* (higher in summer compared to spring), *B. burgdorferi* s.l. (higher in autumn  
 321 compared to spring) and *B. miyamotoi* (higher in winter than in spring). Please note that the  
 322 smallest number of sampled ticks (30 in total) was found in winter, and that the difference  
 323 observed for *B. miyamotoi* in winter corresponded to only one infected tick collected in  
 324 February 2017.

325 Significant differences were also observed between years for bacteria belonging to the  
 326 complex *B. burgdorferi* s.l. with higher infection rates in 2015 and 2016 compared to 2014; for  
 327 *A. phagocytophilum*, which was lower in 2015 and in 2016 compared to 2014 and for  
 328 *R. helvetica*, which was lower in 2017 than in 2014. However, please note that samplings were  
 329 only performed from January to May in 2017. No significant differences were observed  
 330 according to season or year for *B. venatorum*.

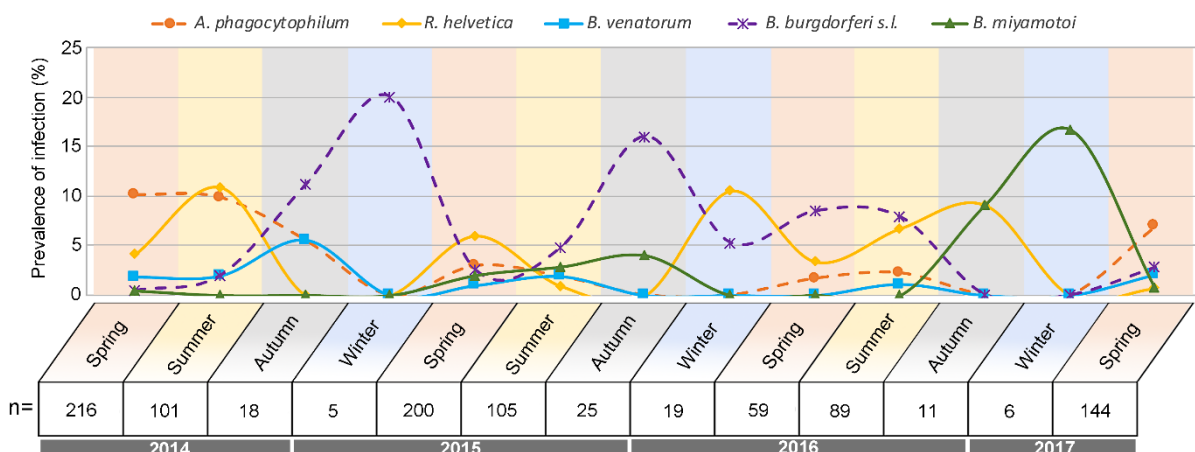

331  
 332 **Figure 5. Percentage of positive nymphs per season for the most prevalent TBPs.** Winter (pastel blue  
 333 background) = January to February – Spring (pastel orange background) = March to May – Summer



334 (pastel yellow background) = June to August – Autumn (light grey background) = September to  
 335 November – n = Number of analysed ticks.

336

| Model | TBP                       | Variable | Odds Ratio   | 95% Confidence Interval |               |   |
|-------|---------------------------|----------|--------------|-------------------------|---------------|---|
|       |                           |          |              | Low                     | High          |   |
| (1)   | <i>B. burgdorferi</i> sl  | Spring   |              | REF                     |               |   |
|       |                           | Autumn   | <b>4.53</b>  | <b>1.50</b>             | <b>12.49</b>  | * |
|       |                           | Summer   | 1.69         | 0.75                    | 3.89          |   |
|       |                           | Winter   | 1.73         | 0.25                    | 7.01          |   |
|       |                           | 2014     |              | REF                     |               |   |
|       |                           | 2015     | <b>2.93</b>  | <b>1.12</b>             | <b>9.14</b>   | * |
|       |                           | 2016     | <b>4.48</b>  | <b>1.60</b>             | <b>14.53</b>  | * |
|       |                           | 2017     | 2.45         | 0.57                    | 9.95          |   |
| (2)   | <i>B. miyamotoi</i>       | Spring   |              | REF                     |               |   |
|       |                           | Autumn   | 0.00         | NA                      | 8.3275E+218   |   |
|       |                           | Summer   | 0.00         | NA                      | 2.26397E+88   |   |
|       |                           | Winter   | <b>28.60</b> | <b>1.03</b>             | <b>800.00</b> | * |
|       |                           |          |              |                         |               |   |
| (3)   | <i>A. phagocytophilum</i> | 2014     |              | REF                     |               |   |
|       |                           | 2015     | <b>0.20</b>  | <b>0.08</b>             | <b>0.42</b>   | * |
|       |                           | 2016     | <b>0.16</b>  | <b>0.04</b>             | <b>0.45</b>   | * |
|       |                           | 2017     | 0.65         | 0.30                    | 1.32          |   |
|       |                           |          |              |                         |               |   |
| (4)   | <i>R. helvetica</i>       | Spring   |              | REF                     |               |   |
|       |                           | Autumn   | 0.00         | 0.00                    | 6.7759E+11    |   |
|       |                           | Summer   | <b>3.10</b>  | <b>1.27</b>             | <b>7.85</b>   | * |
|       |                           | Winter   | 0.00         | NA                      | 1.1447E+145   |   |
|       |                           | 2014     |              | REF                     |               |   |
|       |                           | 2015     | 1.34         | 0.54                    | 3.39          |   |
|       |                           | 2016     | 0.81         | 0.12                    | 3.24          |   |
|       |                           | 2017     | <b>0.16</b>  | <b>0.01</b>             | <b>0.87</b>   | * |
|       |                           |          |              |                         |               |   |

337

338 **Table 2. Multivariable logistic regression models assessing the seasonal and yearly TBP prevalence**  
 339 **variations in nymphs.** Odds ratios and their associated 95% confidence intervals obtained from the  
 340 best model of TBP seasonal and yearly prevalence in questing nymphs. REF = Reference – NA = Not  
 341 Applicable.

342

### 343 Pathogen associations

344 Among all the sampled ticks, 1% [0.5%, 1.8%] were co-infected with two pathogens  
 345 and 0.3% [0.006%, 0.8%] were co-infected with three pathogens. Eight different co-infection  
 346 profiles were found (**Table 3**). In most of cases (7/13), these co-infections concerned species  
 347 belonging to the *Borrelia* genus: *B. garinii*/*B. afzelii*; *B. garinii*/*B. spielmanii*;



348 *B. garinii*/*B. afzelii*/*B. valaisiana* and *B. garinii*/*B. valaisiana*/*B. spielmanii*. Co-infections  
 349 profiles with species belonging to different genus were also observed:  
 350 *A. phagocytophilum*/*B. venatorum*; *A. phagocytophilum*/*R. helvetica*;  
 351 *B. burgdorferi* s.s./*R. helvetica* and *B. garinii*/*B. afzelii*/*R. helvetica*. All these associations  
 352 between pathogens were tested using the association screening approach (Vaumourin *et al.*,  
 353 2014). Compared to a random analysis, no associations were found to be under represented  
 354 while two were over represented: the first one between *B. garinii* and *B. afzelii* (observation =  
 355 3; min expected = 0; max expected = 2), and the second one between *B. garinii* and *B.*  
 356 *spielmanii* (observation = 2; min expected = 0; max expected = 1).

| <i>B. burgdorferi</i> s.s. | <i>B. garinii</i> | <i>B. afzelii</i> | <i>B. valaisiana</i> | <i>B. spielmanii</i> | <i>A. phagocytophilum</i> | <i>R. helvetica</i> | <i>B. venatorum</i> | Co-occurrences number |
|----------------------------|-------------------|-------------------|----------------------|----------------------|---------------------------|---------------------|---------------------|-----------------------|
| X                          | X                 |                   |                      |                      |                           |                     |                     | 3                     |
| X                          |                   |                   | X                    |                      |                           |                     |                     | 2                     |
| X                          | X                 | X                 |                      |                      |                           |                     |                     | 1                     |
| X                          |                   | X                 | X                    |                      |                           |                     |                     | 1                     |
|                            |                   |                   |                      |                      | X                         |                     | X                   | 3                     |
|                            |                   |                   |                      |                      | X                         | X                   |                     | 1                     |
| X                          |                   |                   |                      |                      |                           | X                   |                     | 1                     |
|                            | X                 | X                 |                      |                      |                           | X                   |                     | 1                     |

357  
 358 **Table 3. Summary table of the reported co-infection profiles.**

359  
 360 **Discussion**

361 ***Ixodes ricinus* density and seasonal dynamics**

362 This three-year survey demonstrated a clear seasonal pattern in *I. ricinus* density, with  
 363 a marked peak of questing nymphs in spring and a smaller peak in autumn. Low, but present  
 364 activity was detected in winter, as has been observed in Germany [27]. In addition to these  
 365 general patterns, some unexpected data were observed, the most striking being no peak  
 366 activity in spring 2017 (April and May) with tick densities very similar to those recorded in  
 367 March. Abiotic factors such as temperature, relative humidity, and rainfall, or fluctuating host  
 368 numbers in the sampling area are known to influence questing tick abundance and activity

369 patterns [28–33] and could explain these unusual observations. It's important to note that  
370 2017 was distinguished by an abnormally wet March, with total rainfall much higher than that  
371 recorded in previous years in the same area (71.3, compared to 11.2, 33.6, and 61.7 mm  
372 rain/month in 2014, 2015, and 2016, respectively). Interestingly, the increased March rainfall  
373 was followed by an April drought (7.9 mm of rain/month in 2017, compared to 48.4, 27.2, and  
374 66.2 mm rain/month in 2014, 2015, and 2016, respectively) (rainfall data estimated from the  
375 Orly station, Metéo-France data;  
376 [https://donneespubliques.meteofrance.fr/?fond=produit&id\\_produit=90&id\\_rubrique=32](https://donneespubliques.meteofrance.fr/?fond=produit&id_produit=90&id_rubrique=32)).  
377 These unusual meteorological characteristics could explain the stable tick density from March  
378 to May 2017. Thereby, this finding clearly shows that the bimodal tick activity pattern usually  
379 observed during this study can punctually change with exceptional environmental conditions,  
380 reinforcing the importance of regular monitoring.

381

### 382 ***Ixodes ricinus*-borne pathogen composition and prevalence over the three years**

383 Most of the detected pathogen species corresponded to micro-organisms known to  
384 circulate in the Western Palearctic [34–41]. However, several species belonging to the  
385 *Bartonella* and *Francisella* genera, previously reported in the studied area [39,42], were not  
386 detected. The most prevalent pathogen species were *A. phagocytophilum* (5.4% of the  
387 examined nymphs), *R. helvetica* (4.5%), and *B. burgdorferi* s.l. (3.7%). Both high- and low-  
388 prevalence TBP were consistently detected in the sampling area for the duration of the study.  
389 Although prevalences varied between different TBPs, and some were not detected for long  
390 periods, they were all detected recurrently. Continued detection is consistent with the year-  
391 round presence of reservoir hosts in the sampling area (wood mice, bank voles, Siberian  
392 chipmunks, roe deer, common blackbird, European robin, song thrush...) [33,43,44]. The  
393 continued presence of reservoir hosts could facilitate the circulation of dominant species, and  
394 maintain, even at low rates, less prevalent pathogen species that may not be detected by a  
395 single sampling. This does support to regularly studying TBP temporal dynamics, to improve  
396 the assessment of their prevalence.

397 We also detected in a single tick, the DNA of the emergent human pathogen *R. felis*. Its  
398 detection is particularly scheming as this bacteria is known to be mainly transmitted from cat

399 to cat *via* fleas, with human contamination arising from cat or flea bites. As we only detected  
400 DNA from *R. felis*, we cannot exclude that this detection could correspond to remnant DNA  
401 from the previous blood meal. Nevertheless, several studies have already detected the  
402 presence of *R. felis* or *R. felis*-like organisms in hematophagous arthropods [see in 45,46],  
403 including in ticks collected from natural environments [47], and notably in two studies  
404 performed on questing *I. ricinus*, including one based on RNA detection [48,49]. Rarely  
405 investigated in studies dealing with TBP, the repeated detection of *R. felis* should encourage  
406 increased surveillance for this spotted fever-causing pathogen in humans. Let's finally note  
407 that all these findings suggest that a punctual sampling would certainly not facilitate the  
408 detection of this pathogen, again highlighting the importance of collecting and analysing ticks  
409 at a large temporal scale.

410 *B. divergens* and *B. capreoli* are two closely related species. During this study, we found  
411 out that the design initially used to detect *B. divergens* was actually also able to detect the  
412 DNA of *B. capreoli*. While *B. divergens* is responsible of babesiosis in human and cattle,  
413 *B. capreoli* is only able to colonize erythrocytes from deer, therefore presenting no threat for  
414 human or livestock [26]. These results emphasizes the importance of confirmation and careful  
415 interpretations of microfluidic real time PCR [50].

416

#### 417 **Seasonal and inter-annual dynamics of *I. ricinus*-borne pathogens**

418 Improving the prevention of TBD requires a better understanding of their temporal—  
419 and in particular—their seasonal dynamics. However, only a few studies have addressed these  
420 issues during a minimum three-year period [12,13]. As ticks were collected monthly for over  
421 three years in this study, we detected significant seasonal or annual infection rate fluctuations  
422 for four TBP: *R. helvetica*, *B. burgdorferi* s.l., *B. miyamotoi*, and *A. phagocytophilum*. Note that  
423 the statistically significant highest prevalence of *B. miyamotoi* in winter is only due to the  
424 detection of one positive tick sampled during winter in 2017. In our opinion, this result alone  
425 is insufficient to presume that *B. miyamotoi* have an increased winter prevalence. However,  
426 we can observe that even if very few ticks are questing during these periods, they may carry  
427 TBP.

428           While significant seasonal and annual differences were observed for *B. miyamotoi* and  
429 *A. phagocytophilum*, respectively, the presence of *R. helvetica* and *B. burgdorferi* s.l. varied  
430 significantly according to both seasons and years. None of these micro-organisms presented a  
431 similar pattern to any others. Comparing our results to the pluri-annual studies previously  
432 mentioned, we observe that only *R. helvetica* presented similar seasonal patterns [12]. This  
433 finding again emphasises how the season, the year or the sampling area can influence TBP  
434 presence and prevalence in questing tick populations.

435           The most common explanation for temporal variations in TBP prevalences is the  
436 variable availability of reservoir hosts during tick previous stage feeding. This hypothesis was  
437 already suggested by Coipan *et al.* [12] while they observed that several micro-organisms,  
438 assumed to share the same reservoir host, also presented similar seasonal patterns. Because  
439 the tick lifecycle is fundamentally linked to its host, any changes to the available host spectrum  
440 will undoubtedly influence TBP prevalence in the tick community [51]. However, because the  
441 entire tick life cycle is pluri-annual, it is difficult anyway to know if nymphs questing at a same  
442 time did perform their previous blood meal at the same period. The same generation of  
443 questing nymphs could come from larvae that would have fed at different moment and thus  
444 potentially upon different host species. An alternative hypothesis, based on both the presence  
445 of pathogens and the tick physiology, could also explain these patterns. Carrying certain TBP  
446 was shown to improve tick resistance to challenging abiotic conditions. Herrmann and Gern  
447 [17,18] demonstrated that ticks carrying *Borrelia* species exhibited higher survival rates in  
448 desiccating conditions and a lower tendency to move to favourable conditions for maintaining  
449 water balance than non-infected ticks. This was associated to a higher reserve of energy in  
450 *Borrelia* infected ticks [52] which would therefore exhibit higher resistance capacities to hydric  
451 stress notably. This hypothesis would explain the higher prevalence of *Borrelia*-infected  
452 questing ticks observed during or after the summer period in the present study and in those  
453 of Coipan and Takken [12,13]. Similarly, Neelakanta [19] demonstrated a higher expression of  
454 *iafgp* gene, coding for an antifreeze glycoprotein, in *A. phagocytophilum*-infected ticks. This  
455 thus conferred to ticks a stronger resistance to cold that could lead to higher prevalence of  
456 *A. phagocytophilum*-infected questing ticks during or just after winter. This hypothesis was not  
457 consistent with our data as *A. phagocytophilum* was not observed in greater prevalence during  
458 the cold seasons of our study.

459 Our results, in combination with those from the literature, support the hypothesis that  
460 TBP prevalence is influenced by both biotic and abiotic factors, and suggest one more time  
461 that sporadic samplings are insufficient to assess it.

462

### 463 **Pathogen co-occurrence**

464 Tick co-infections are being identified more and more frequently [21,41,49,53–57].  
465 Clinical co-infections with several TBP are commonly reported [58–60] and are known to affect  
466 both disease symptoms and severity [61,62]. It is thus essential to investigate TBP associations  
467 in ticks, to better identify potential clinical co-infections and to improve epidemiological  
468 knowledge of TBD.

469 In this longitudinal three-year study, two TBP associations were significantly over-  
470 represented compared to a random distribution: the first one was between *B. garinii* and  
471 *B. afzelii*, as has been previously observed in studies using similar detection tools [21,41], or  
472 different methods [16s rRNA gene sequencing, 63]; the second one was between *B. garinii* and  
473 *B. spielmanii*. Interestingly, these findings contrast with published results on *Ixodes ricinus* TBP.  
474 While performing a meta-analysis on data published from 2010 to 2016, Strnad *et al* [64]  
475 observed a negative correlation between *B. garinii* and *B. afzelii*. Similarly, Herrmann *et al.* [65]  
476 also detected a negative co-occurrence between these two species following the analysis of  
477 7400 nymphs collected over three years. These results are coherent considering the host  
478 specificity of these Borrelia species. Indeed, *B. garinii* doesn't share the same reservoir host  
479 (birds) than *B. afzelii* or *B. spielmanii* (wood mice and bank voles, or hazel and garden dormice)  
480 [66–71], and none of these species are known to be transmitted transovarially.

481 Even though the associations we identified were statistically “over-represented”, in  
482 actual fact we only observed one more association than the fixed over-representation  
483 threshold (i.e. observed associations = 3 and 2; minimum expected = 0 and 0; maximum  
484 expected = 2 and 1; for *B. garinii/B. afzelii* and *B. garinii/B. spielmanii* associations,  
485 respectively). This indicates that caution should be applied when drawing conclusions about  
486 permanent associations between these different bacteria in ticks. Several different hypotheses  
487 could potentially explain these associations in the same nymph. Firstly, hosts are likely to carry  
488 several adjacent feeding ticks. This phenomenon, known as co-feeding, could promote

489 pathogen exchange between ticks even in the absence of systemic host infection [72].  
490 Secondly, as discussed by van Duijvendijk *et al.* [73], when bloodmeals are disrupted due to  
491 host grooming, immune response or death, ticks may feed on more than one host to  
492 completely engorge, and consequently be exposed to several pathogens. Thirdly, despite these  
493 TBP species segregating between bird and rodent hosts, all of them have been detected in  
494 hedgehogs [74,75], and *B. afzelii* and *B. garinii* have been simultaneously detected in one  
495 Siberian chipmunk [44]. Both of these mammals were found to host a large number of tick  
496 larvae [44,76], and Siberian chipmunks have been reported to induce higher *B. burgdorferi* s.l.  
497 infection rates in nymphs, compared to bank voles and wood mice [44] in the Sénart forest. A  
498 last hypothesis might be that our analyses methods are unable to distinguish the rodent-  
499 circulating *B. garinii* OspA serotype 4 (corresponding to *B. bavariensis*) [77] from other  
500 *B. garinii* serotypes.

501         Associations between *B. garinii* and *B. valaisiana* are frequently reported, which isn't  
502 surprising as these species share the same reservoir host [78]. This association was the most  
503 common TBP association in a meta-analysis of literature published between 1984 and 2003  
504 [79], and has been reported several times since in later studies [11,65,80]. While we observed  
505 this association twice, both times in association with a third *Borrelia* species, either *B. afzelii*  
506 or *B. spielmanii*, it was not significantly over-represented compared to a random distribution.  
507 Among the three previously mentioned studies, only Herrmann *et al.* [65] demonstrated that  
508 this association was over-represented when compared to a randomly sampled analysis.  
509 However, our study was performed on a much smaller dataset (998 versus 7400 analysed  
510 nymphs), with a halved co-infection percentage (1.3% versus 3%), indicating that our statistical  
511 analysis may be less powerful, which could explain why this association wasn't detected.

512         These contrasting tick pathogen association results highlight the complexity in clearly  
513 identifying pathogen associations in field-collected ticks. Several other parameters can also  
514 potentially influence pathogen association (host spectrum within the studied area, sample size  
515 influencing analytical statistical power, identification bias...). In this context, performing  
516 investigations under controlled conditions (suitable TBP growing and tick breeding systems...)  
517 will be a crucial future step to experimentally test these different associations and improve our  
518 knowledge on TBP co-occurrence.

519

## 520 Conclusions

521 This three-year study of *I. ricinus*-borne pathogens; (1) identified several TBP  
522 previously reported in the area, consistent with reservoir host availability; (2) allowed the  
523 surprising detection of *R. felis* DNA, a micro-organism rarely reported in questing ticks; (3)  
524 highlighted significant variations in seasonal and inter-annual pathogen prevalence; and finally  
525 (4) identified several unexpected co-occurrences between pathogens belonging to the  
526 *B. burgdorferi* s.l. complex. All these results represent another step towards understanding the  
527 TBPs ecology and emphasize the need to perform longitudinal study. Especially since the main  
528 factors that are supposed to influence tick and TBP ecology may change in the next coming  
529 years with climate changes. Associated to other factors such as host information or  
530 meteorological measures, this kind of data is crucial to allow a better understanding of TBP  
531 ecology and TBD epidemiology.

532

## 533 Additional files

534 **Additional file 1: Table S1.** Targeted gene, amplicon size, primers and probe sequences used  
535 for TBP and Tick species detection.

536 **Additional file 2: Table S2.** Targeted gene and primers sequences used for results confirmation.

537

## 538 Abbreviation

539 TBP: tick-borne pathogens; TBD: tick-borne disease; LB: lyme borreliosis; *I. ricinus*: *Ixodes*  
540 *ricinus*; s.l.: sensu lato; s.s.: sensu stricto; *B. burgdorferi*: *Borrelia burgdorferi*; *B. afzelii*:  
541 *Borrelia afzelii*; *B. garinii*: *Borrelia garinii*; *B. valaisiana*: *Borrelia valaisiana*; *B. spielmanii*:  
542 *Borrelia spielmanii*; *B. lusitaniae*: *Borrelia lusitaniae*; *B. bissettii*: *Borrelia bissettii*;  
543 *B. miyamotoi*: *Borrelia miyamotoi*; *A. phagocytophilum*: *Anaplasma phagocytophilum*;  
544 *A. marginale*: *Anaplasma marginale*; *A. platys*: *Anaplasma platys*; *A. centrale*: *Anaplasma*  
545 *centrale*; *A. bovis*: *Anaplasma bovis*; *B. venatorum*: *Babesia venatorum*; *B. divergens*: *Babesia*  
546 *divergens*; *B. capreoli*: *Babesia capreoli*; *B. microti*: *Babesia microti*; *B. caballi*: *Babesia caballi*;  
547 *B. canis*: *Babesia canis*; *B. bovis*: *Babesia bovis*; *B. ovis*: *Babesia ovis*; *B. henselae*: *Bartonella*



548 *henselae*; *E. canis*: *Ehrlichia canis*; *R. helvetica*: *Rickettsia helvetica*; *R. felis*: *Rickettsia felis*;  
549 *R. conorii*: *Rickettsia conorii*; *R. slovaca*: *Rickettsia slovaca*; *R. massiliae*: *Rickettsia massiliae*;  
550 *R. aeschlimanii*: *Rickettsia aeschlimanii*; DMEM: Dulbecco's Modified Eagle Medium; NCBI:  
551 National Center for Biotechnology Information; BLAST: Basic Local Alignment Search Tool;  
552 GLM: Generalized Linear Model; AIC: Akaike Information Criterion; OR: Odds Ratios; NP:  
553 Number of Pathogen species tested; NC: Number of possible Combination; iafgp: *Ixodes*  
554 *scapularis* antifreeze glycoprotein

555

## 556 **Acknowledgments**

557 The authors would like to thank the financiers of this project, that are the French  
558 National Institute of Agronomic Research (INRA): the métaprogramme “Metaomics and  
559 microbial ecosystems” (MEM) and the Métaprogramme “Adaptation of Agriculture and Forests  
560 to Climate Change” (ACCAF) that funded the tick collection from the CC-EID project. We also  
561 would like to thank the Ile-de-France region that funded the salary of Emilie Lejal, the PhD  
562 student working on this project. We are very grateful to all the persons that brought their help  
563 to the support of the technical part of this project: Julie Cat, Valérie Poux and members of the  
564 VECTOTIQ team for their involvement in tick samplings and identification; Elodie Devillers, for  
565 her precious help to learn the Microfluidic PCR approach and also Sabine Delannoy and the  
566 IdentityPath genomic platform that allowed us to perform the tick-borne pathogens screening.  
567 Thank you as well to Ladislav Šimo for his precious help in figure improvement.

568

## 569 **Authors' contributions**

570 Conceived and designed the experiments: TP, MVT, JFC, KCM, EL. Performed the experiments:  
571 EL. Analysed the data: EL, TP, SM, MM, KCM. Wrote the paper: EL, MM, KCM, JFC, SM, MVT, TP

572

## 573 **References**

574 1. Jongejans F, Uilenberg G. The global importance of ticks. *Parasitology*. 2004;129:S3–14.



- 575 2. de la Fuente J, Estrada-Pena A, Venzal JM, Kocan KM, Sonenshine DE. Overview: ticks as vectors of  
576 pathogens that cause disease in humans and animals. *Front Biosci.* 2008;13:6938–6946.
- 577 3. Dantas-Torres F, Chomel BB, Otranto D. Ticks and tick-borne diseases: a One Health perspective.  
578 *Trends Parasitol.* 2012;28:437–46.
- 579 4. Strle F. Human granulocytic ehrlichiosis in Europe. *Int J Med Microbiol Suppl.* 2004;293:27–35.
- 580 5. Bonnet S, Jouglin M, L’Hostis M, Chauvin A. Babesia sp. EU1 from Roe Deer and Transmission within  
581 *Ixodes ricinus*. *Emerg Infect Dis.* 2007;13:1208–10.
- 582 6. Bonnet S, Jouglin M, Malandrin L, Becker C, Agoulon A, L’hostis M, et al. Transstadial and transovarial  
583 persistence of Babesia divergens DNA in Ixodes ricinus ticks fed on infected blood in a new skin-feeding  
584 technique. *Parasitology.* 2007;134:197–207.
- 585 7. Cotté V, Bonnet S, Le Rhun D, Le Naour E, Chauvin A, Boulouis H-J, et al. Transmission of Bartonella  
586 henselae by Ixodes ricinus. *Emerg Infect Dis.* 2008;14:1074–80.
- 587 8. Bonnet S, Brisseau N, Hermouet A, Jouglin M, Chauvin A. Experimental in vitro transmission of  
588 Babesia sp. (EU1) by Ixodes ricinus. *Vet Res.* 2009;40:1–8.
- 589 9. Sprong H, Wielinga PR, Fonville M, Reusken C, Brandenburg AH, Borgsteede F, et al. Ixodes ricinus  
590 ticks are reservoir hosts for Rickettsia helvetica and potentially carry flea-borne Rickettsia species.  
591 *Parasit Vectors.* 2009;2:41.
- 592 10. Gassner F, van Vliet AJH, Burgers SLGE, Jacobs F, Verbaarschot P, Hovius EKE, et al. Geographic and  
593 Temporal Variations in Population Dynamics of Ixodes ricinus and Associated Borrelia Infections in The  
594 Netherlands. *Vector-Borne Zoonotic Dis.* 2010;11:523–32.
- 595 11. Reye AL, Hübschen JM, Sausy A, Muller CP. Prevalence and Seasonality of Tick-Borne Pathogens in  
596 Questing Ixodes ricinus Ticks from Luxembourg. *Appl Environ Microbiol.* 2010;76:2923–31.
- 597 12. Coipan EC, Jahfari S, Fonville M, Maassen C, van der Giessen J, Takken W, et al. Spatiotemporal  
598 dynamics of emerging pathogens in questing Ixodes ricinus. *Front Cell Infect Microbiol [Internet].* 2013  
599 [cited 2018 Jul 25];3. Available from:  
600 <https://www.frontiersin.org/articles/10.3389/fcimb.2013.00036/full>

- 601 13. Takken W, van Vliet AJH, Verhulst NO, Jacobs FHH, Gassner F, Hartemink N, et al. Acarological Risk  
602 of *Borrelia burgdorferi* Sensu Lato Infections Across Space and Time in The Netherlands. *Vector-Borne*  
603 *Zoonotic Dis.* 2016;17:99–107.
- 604 14. Chvostáč M, Špitalská E, Václav R, Vaculová T, Minichová L, Derdáková M. Seasonal Patterns in the  
605 Prevalence and Diversity of Tick-Borne *Borrelia burgdorferi* Sensu Lato, *Anaplasma phagocytophilum*  
606 and *Rickettsia* spp. in an Urban Temperate Forest in South Western Slovakia. *Int J Environ Res Public*  
607 *Health.* 2018;15:994.
- 608 15. Gilbert L, Maffey GL, Ramsay SL, Hester AJ. The effect of deer management on the abundance of  
609 *Ixodes ricinus* in Scotland. *Ecol Appl.* 2012;22:658–67.
- 610 16. van Wieren SE, Hofmeester TR. 6. The role of large herbivores in *Ixodes ricinus* and *Borrelia*  
611 *burgdorferi* s.l. dynamics. *Ecol Prev Lyme Borreliosis* [Internet]. Wageningen Academic Publishers; 2016  
612 [cited 2018 Nov 19]. p. 75–89. Available from:  
613 [https://www.wageningenacademic.com/doi/abs/10.3920/978-90-8686-838-4\\_6](https://www.wageningenacademic.com/doi/abs/10.3920/978-90-8686-838-4_6)
- 614 17. Herrmann C, Gern L. Survival of *Ixodes ricinus* (Acari: Ixodidae) Under Challenging Conditions of  
615 Temperature and Humidity is Influenced by *Borrelia burgdorferi* sensu lato Infection. *J Med Entomol.*  
616 2010;47:1196–204.
- 617 18. Herrmann C, Gern L. Do the level of energy reserves, hydration status and *Borrelia* infection  
618 influence walking by *Ixodes ricinus* (Acari: Ixodidae) ticks? *Parasitology.* 2012;139:330–7.
- 619 19. Neelakanta G, Sultana H, Fish D, Anderson JF, Fikrig E. *Anaplasma phagocytophilum* induces *Ixodes*  
620 *scapularis* ticks to express an antifreeze glycoprotein gene that enhances their survival in the cold. *J*  
621 *Clin Invest.* 2010;120:3179–90.
- 622 20. Michelet L, Delannoy S, Devillers E, Umhang G, Aspan A, Juremalm M, et al. High-throughput  
623 screening of tick-borne pathogens in Europe. *Front Cell Infect Microbiol.* 2014;4:103.
- 624 21. Moutailler S, Moro CV, Vaumourin E, Michelet L, Tran FH, Devillers E, et al. Co-infection of Ticks:  
625 The Rule Rather Than the Exception. *PLoS Negl Trop Dis.* 2016;10:e0004539.
- 626 22. Gondard M, Delannoy S, Pinarello V, Aprelon R, Devillers E, Galon C, et al. Upscaling surveillance of  
627 tick-borne pathogens in the French Caribbean islands. *bioRxiv.* 2019;532457.

- 628 23. McCullagh P, Nelder JA. Generalized Linear Models. [Internet]. 2nd Edition. London: Chapman et  
629 Hall; 1989 [cited 2019 Feb 28]. Available from: [https://www.crcpress.com/Generalized-Linear-](https://www.crcpress.com/Generalized-Linear-Models/McCullagh-Nelder/p/book/9780412317606)  
630 [Models/McCullagh-Nelder/p/book/9780412317606](https://www.crcpress.com/Generalized-Linear-Models/McCullagh-Nelder/p/book/9780412317606)
- 631 24. R Core Team. R: A Language and Environment for Statistical Computing [Internet]. Vienna, Austria:  
632 R Foundation for Statistical Computing; 2018. Available from: <https://www.R-project.org/>
- 633 25. Vaumourin E, Vourc'h G, Telfer S, Lambin X, Salih D, Seitzer U, et al. To be or not to be associated:  
634 power study of four statistical modeling approaches to identify parasite associations in cross-sectional  
635 studies. *Front Cell Infect Microbiol.* 2014;4:62.
- 636 26. Malandrin L, Jouglin M, Sun Y, Brisseau N, Chauvin A. Redescription of *Babesia capreoli* (Enigg and  
637 Friedhoff, 1962) from roe deer (*Capreolus capreolus*): Isolation, cultivation, host specificity, molecular  
638 characterisation and differentiation from *Babesia divergens*. *Int J Parasitol.* 2010;40:277–84.
- 639 27. Dautel H, Dippel C, Kämmer D, Werkhausen A, Kahl O. Winter activity of *Ixodes ricinus* in a Berlin  
640 forest. *Int J Med Microbiol.* 2008;298:50–4.
- 641 28. Perret J-L, Guigoz E, Rais O, Gern L. Influence of saturation deficit and temperature on *Ixodes ricinus*  
642 tick questing activity in a Lyme borreliosis-endemic area (Switzerland). *Parasitol Res.* 2000;86:554–7.
- 643 29. Gilbert L. Altitudinal patterns of tick and host abundance: a potential role for climate change in  
644 regulating tick-borne diseases? *Oecologia.* 2010;162:217–25.
- 645 30. Tagliapietra V, Rosà R, Arnoldi D, Cagnacci F, Capelli G, Montarsi F, et al. Saturation deficit and deer  
646 density affect questing activity and local abundance of *Ixodes ricinus* (Acari, Ixodidae) in Italy. *Vet*  
647 *Parasitol.* 2011;183:114–24.
- 648 31. Schulz M, Mahling Monia, Pfister Kurt. Abundance and seasonal activity of questing *Ixodes ricinus*  
649 ticks in their natural habitats in southern Germany in 2011. *J Vector Ecol.* 2014;39:56–65.
- 650 32. Vourc'h G, Abrial D, Bord S, Jacquot M, Masségli S, Poux V, et al. Mapping human risk of infection  
651 with *Borrelia burgdorferi sensu lato*, the agent of Lyme borreliosis, in a periurban forest in France. *Ticks*  
652 *Tick-Borne Dis.* 2016;7:644–52.
- 653 33. Marchant A, Coupanec AL, Joly C, Perthame E, Sertour N, Garnier M, et al. Infection of *Ixodes ricinus*  
654 by *Borrelia burgdorferi sensu lato* in peri-urban forests of France. *PLOS ONE.* 2017;12:e0183543.

- 655 34. Capelli G, Ravagnan S, Montarsi F, Ciocchetta S, Cazzin S, Porcellato E, et al. Occurrence and  
656 identification of risk areas of *Ixodes ricinus*-borne pathogens: a cost-effectiveness analysis in north-  
657 eastern Italy. *Parasit Vectors*. 2012;5:61.
- 658 35. Overzier E, Pfister K, Herb I, Mahling M, Böck G, Silaghi C. Detection of tick-borne pathogens in roe  
659 deer (*Capreolus capreolus*), in questing ticks (*Ixodes ricinus*), and in ticks infesting roe deer in southern  
660 Germany. *Ticks Tick-Borne Dis*. 2013;4:320–8.
- 661 36. Pangráčová L, Derdáková M, Pekárik L, Hviščová I, Víchová B, Stanko M, et al. *Ixodes ricinus*  
662 abundance and its infection with the tick-borne pathogens in urban and suburban areas of Eastern  
663 Slovakia. *Parasit Vectors*. 2013;6:238.
- 664 37. Reye AL, Stegnyy V, Mishaeva NP, Velhin S, Hübschen JM, Ignatyev G, et al. Prevalence of Tick-Borne  
665 Pathogens in *Ixodes ricinus* and *Dermacentor reticulatus* Ticks from Different Geographical Locations  
666 in Belarus. *PLOS ONE*. 2013;8:e54476.
- 667 38. Hansford KM, Fonville M, Jahfari S, Sprong H, Medlock JM. *Borrelia miyamotoi* in host-seeking  
668 *Ixodes ricinus* ticks in England. *Epidemiol Infect*. 2015;143:1079–87.
- 669 39. Paul REL, Cote M, Le Naour E, Bonnet SI. Environmental factors influencing tick densities over seven  
670 years in a French suburban forest. *Parasit Vectors*. 2016;9:309.
- 671 40. Sormunen JJ, Penttinen R, Klemola T, Hänninen J, Vuorinen I, Laaksonen M, et al. Tick-borne  
672 bacterial pathogens in southwestern Finland. *Parasit Vectors*. 2016;9:168.
- 673 41. Raileanu C, Moutailler S, Pavel I, Porea D, Mihalca AD, Savuta G, et al. *Borrelia* Diversity and Co-  
674 infection with Other Tick Borne Pathogens in Ticks. *Front Cell Infect Microbiol* [Internet]. 2017 [cited  
675 2019 Jan 14];7. Available from: <http://journal.frontiersin.org/article/10.3389/fcimb.2017.00036/full>
- 676 42. Reis C, Cote M, Paul REL, Bonnet S. Questing Ticks in Suburban Forest Are Infected by at Least Six  
677 Tick-Borne Pathogens. *Vector-Borne Zoonotic Dis*. 2010;11:907–16.
- 678 43. Marsot M, Henry P-Y, Vourc’h G, Gasqui P, Ferquel E, Laignel J, et al. Which forest bird species are  
679 the main hosts of the tick, *Ixodes ricinus*, the vector of *Borrelia burgdorferi sensu lato*, during the  
680 breeding season? *Int J Parasitol*. 2012;42:781–8.
- 681 44. Marsot M, Chapuis J-L, Gasqui P, Dozières A, Masségli S, Pisanu B, et al. Introduced Siberian  
682 Chipmunks (*Tamias sibiricus barberi*) Contribute More to Lyme Borreliosis Risk than Native Reservoir  
683 Rodents. *PLOS ONE*. 2013;8:e55377.

- 684 45. Reif KE, Macaluso KR. Ecology of *Rickettsia felis*: A Review. *J Med Entomol.* 2009;46:723–36.
- 685 46. Brown LD, Macaluso KR. *Rickettsia felis*, an Emerging Flea-Borne Rickettsiosis. *Curr Trop Med Rep.*  
686 2016;3:27–39.
- 687 47. Oliveira K, S Oliveira L, C A Dias C, Silva A, R Almeida M, Almada G, et al. Molecular identification of  
688 *Rickettsia felis* in ticks and fleas from an endemic area for Brazilian Spotted Fever. 2008.
- 689 48. Vayssier-Taussat M, Moutailler S, Michelet L, Devillers E, Bonnet S, Cheval J, et al. Next Generation  
690 Sequencing Uncovers Unexpected Bacterial Pathogens in Ticks in Western Europe. *PLOS ONE.*  
691 2013;8:e81439.
- 692 49. Lejal E, Moutailler S, Šimo L, Vayssier-Taussat M, Pollet T. Tick-borne pathogen detection in midgut  
693 and salivary glands of adult *Ixodes ricinus*. *Parasit Vectors.* 2019;12:152.
- 694 50. Sprong H, Fonville M, Docters van Leeuwen A, Devillers E, Ibañez-Justicia A, Stroo A, et al. Detection  
695 of pathogens in *Dermacentor reticulatus* in northwestern Europe: evaluation of a high-throughput  
696 array. *Heliyon.* 2019;5:e01270.
- 697 51. Pfäffle M, Littwin N, Muders SV, Petney TN. The ecology of tick-borne diseases. *Int J Parasitol.*  
698 2013;43:1059–77.
- 699 52. Herrmann C, Voordouw MJ, Gern L. *Ixodes ricinus* ticks infected with the causative agent of Lyme  
700 disease, *Borrelia burgdorferi sensu lato*, have higher energy reserves. *Int J Parasitol.* 2013;43:477–83.
- 701 53. Halos L, Jamal T, Maillard R, Beugnet F, Menach AL, Boulouis H-J, et al. Evidence of *Bartonella* sp. in  
702 questing adult and nymphal *Ixodes ricinus* ticks from France and co-infection with *Borrelia burgdorferi*  
703 *sensu lato* and *Babesia* sp. *Vet Res.* 2005;36:79–87.
- 704 54. Schicht S, Junge S, Schnieder T, Strube C. Prevalence of *Anaplasma phagocytophilum* and  
705 Coinfection with *Borrelia burgdorferi Sensu Lato* in the Hard Tick *Ixodes ricinus* in the City of Hanover  
706 (Germany). *Vector-Borne Zoonotic Dis.* 2011;11:1595–7.
- 707 55. Andersson M, Bartkova S, Lindestad O, Råberg L. Co-Infection with ‘*Candidatus Neoehrlichia*  
708 *mikurensis*’ and *Borrelia afzelii* in *Ixodes ricinus* Ticks in Southern Sweden. *Vector-Borne Zoonotic Dis.*  
709 2013;13:438–42.

- 710 56. Cosson J-F, Michelet L, Chotte J, Le Naour E, Cote M, Devillers E, et al. Genetic characterization of  
711 the human relapsing fever spirochete *Borrelia miyamotoi* in vectors and animal reservoirs of Lyme  
712 disease spirochetes in France. *Parasit Vectors*. 2014;7:233.
- 713 57. Castro LR, Gabrielli S, Iori A, Cancrini G. Molecular detection of *Rickettsia*, *Borrelia*, and *Babesia*  
714 species in *Ixodes ricinus* sampled in northeastern, central, and insular areas of Italy. *Exp Appl Acarol*.  
715 2015;66:443–52.
- 716 58. Tjisse-Klasen E, Sprong H, Pandak N. Co-infection of *Borrelia burgdorferi sensu lato* and *Rickettsia*  
717 species in ticks and in an erythema migrans patient. *Parasit Vectors*. 2013;6:347.
- 718 59. Moniuszko A, Dunaj J, Świącicka I, Zambrowski G, Chmielewska-Badora J, Żukiewicz-Sobczak W, et  
719 al. Co-infections with *Borrelia* species, *Anaplasma phagocytophilum* and *Babesia* spp. in patients with  
720 tick-borne encephalitis. *Eur J Clin Microbiol Infect Dis*. 2014;33:1835–41.
- 721 60. Hoversten K, Bartlett MA. Diagnosis of a tick-borne coinfection in a patient with persistent  
722 symptoms following treatment for Lyme disease. *Case Rep*. 2018;2018:bcr-2018-225342.
- 723 61. Krause PJ, Telford SR, Spielman A, Sikand V, Ryan R, Christianson D, et al. Concurrent Lyme Disease  
724 and Babesiosis: Evidence for Increased Severity and Duration of Illness. *JAMA*. 1996;275:1657–60.
- 725 62. Diuk-Wasser MA, Vannier E, Krause PJ. Coinfection by *Ixodes* Tick-Borne Pathogens: Ecological,  
726 Epidemiological, and Clinical Consequences. *Trends Parasitol*. 2016;32:30–42.
- 727 63. Avelo T, Norberg A, Tschirren B. Human pathogen co-occurrence in *Ixodes ricinus* ticks: effects of  
728 landscape topography, climatic factors and microbiota interactions. *bioRxiv*. 2019;559245.
- 729 64. Strnad M, Hönig V, Růžek D, Grubhoffer L, Rego ROM. Europe-Wide Meta-Analysis of *Borrelia*  
730 *burgdorferi* Sensu Lato Prevalence in Questing *Ixodes ricinus* Ticks. Stabb EV, editor. *Appl Environ*  
731 *Microbiol*. 2017;83:e00609-17.
- 732 65. Herrmann C, Gern L, Voordouw MJ. Species co-occurrence patterns among Lyme borreliosis  
733 pathogens in the tick vector *Ixodes ricinus*. *Appl Environ Microbiol*. 2013;AEM.02158-13.
- 734 66. Humair P-F, Postic D, Wallich R, Gern L. An Avian Reservoir (*Turdus merula*) of the Lyme Borreliosis  
735 Spirochetes. *Zentralblatt Für Bakteriologie*. 1998;287:521–38.
- 736 67. Kurtenbach K, Carey D, Hoodless AN, Nuttall PA, Randolph SE. Competence of Pheasants as  
737 Reservoirs for Lyme Disease Spirochetes. *J Med Entomol*. 1998;35:77–81.

- 738 68. Huegli D, Hu CM, Humair P-F, Wilske B, Gern L. Apodemus Species Mice Are Reservoir Hosts of  
739 *Borrelia garinii* OspA Serotype 4 in Switzerland. *J Clin Microbiol.* 2002;40:4735–7.
- 740 69. Richter D, Schlee DB, Allgower R, Matuschka F-R. Relationships of a Novel Lyme Disease Spirochete,  
741 *Borrelia spielmani* sp. nov., with Its Hosts in Central Europe. *Appl Environ Microbiol.* 2004;70:6414–9.
- 742 70. Richter D, Schlee DB, Matuschka F-R. Reservoir Competence of Various Rodents for the Lyme  
743 Disease Spirochete *Borrelia spielmanii*. *Appl Environ Microbiol.* 2011;77:3565–70.
- 744 71. Taragel’ova V, Koci J, Hanincova K, Kurtenbach K, Derdakova M, Ogden NH, et al. Blackbirds and  
745 Song Thrushes Constitute a Key Reservoir of *Borrelia garinii*, the Causative Agent of Borreliosis in  
746 Central Europe. *Appl Environ Microbiol.* 2008;74:1289–93.
- 747 72. Randolph SE, Gern L, Nuttall PA. Co-feeding ticks: Epidemiological significance for tick-borne  
748 pathogen transmission. *Parasitol Today.* 1996;12:472–9.
- 749 73. van Duijvendijk G, Coipan C, Wagemakers A, Fonville M, Ersöz J, Oei A, et al. Larvae of *Ixodes ricinus*  
750 transmit *Borrelia afzelii* and *B. miyamotoi* to vertebrate hosts. *Parasit Vectors* [Internet]. 2016 [cited  
751 2019 Jan 14];9. Available from: <http://www.parasitesandvectors.com/content/9/1/97>
- 752 74. Skuballa J, Oehme R, Hartelt K, Petney T, Bücher T, Kimmig P, et al. European Hedgehogs as Hosts  
753 for *Borrelia* spp., Germany. *Emerg Infect Dis.* 2007;13:952–3.
- 754 75. Skuballa J, Petney T, Pfäffle M, Oehme R, Hartelt K, Fingerle V, et al. Occurrence of different *Borrelia*  
755 *burgdorferi* sensu lato genospecies including *B. afzelii*, *B. bavariensis*, and *B. spielmanii* in hedgehogs  
756 (*Erinaceus* spp.) in Europe. *Ticks Tick-Borne Dis.* 2012;3:8–13.
- 757 76. Gern L, Rouvinez E, Toutoungi LN, Godfroid E. Transmission cycles of *Borrelia burgdorferi* sensu lato  
758 involving *Ixodes ricinus* and/or *I. hexagonus* ticks and the European hedgehog, *Erinaceus europaeus*, in  
759 suburban and urban areas in Switzerland. *Folia Parasitol (Praha).* 1997;44:309–14.
- 760 77. Margos G, Vollmer SA, Cornet M, Garnier M, Fingerle V, Wilske B, et al. A New *Borrelia* Species  
761 Defined by Multilocus Sequence Analysis of Housekeeping Genes. *Appl Environ Microbiol.*  
762 2009;75:5410–6.
- 763 78. Hanincova K, Taragelova V, Koci J, Schafer SM, Hails R, Ullmann AJ, et al. Association of *Borrelia*  
764 *garrinii* and *B. valaisiana* with Songbirds in Slovakia. *Appl Environ Microbiol.* 2003;69:2825–30.

- 765 79. Rauter C, Hartung T. Prevalence of *Borrelia burgdorferi* Sensu Lato Genospecies in *Ixodes ricinus*  
766 Ticks in Europe: a Metaanalysis. *Appl Environ Microbiol.* 2005;71:7203–16.
- 767 80. Lommano E, Bertaiola L, Dupasquier C, Gern L. Infections and co-infections of questing *Ixodes*  
768 *ricinus* ticks by emerging zoonotic pathogens in Western Switzerland. *Appl Environ Microbiol.*  
769 2012;AEM.07961-11.



770 **Table S1.**

| Targeted TBP                     | Targeted gene | Identity | Sequence                         | Amplicon size (bp) | Reference |
|----------------------------------|---------------|----------|----------------------------------|--------------------|-----------|
| <i>Borrelia burgdorferi</i>      | rpoB          | Forward  | GCTTACTCACAAAAGGCGTCTT           | 83                 | [20]      |
|                                  |               | Reverse  | GCACATCTTACTTCAAATCCT            |                    |           |
|                                  |               | Probe    | AATGCTCTTGGACCAGGAGGACTTTCA      |                    |           |
| <i>Borrelia garinii</i>          | rpoB          | Forward  | TGGCCGAAGTACCCACAAAA             | 88                 | [20]      |
|                                  |               | Reverse  | ACATCTTACTTCAAATCCTGC            |                    |           |
|                                  |               | Probe    | TCTATCTCTTGAAAGTCCCCTGGTCC       |                    |           |
| <i>Borrelia afzelii</i>          | fla           | Forward  | GGAGCAAATCAAGATGAAGCAAT          | 116                | [20]      |
|                                  |               | Reverse  | TGAGCACCTCTTGAACAGG              |                    |           |
|                                  |               | Probe    | TGCAGCTGAGCAGCTTGAGCTCC          |                    |           |
| <i>Borrelia valaisiana</i>       | ospA          | Forward  | ACTCACAAATGACAGATGCTGAA          | 135                | [20]      |
|                                  |               | Reverse  | GCTTGCTTAAAGTAAACAGTACCT         |                    |           |
|                                  |               | Probe    | TCCGCCTACAAGATTTCTGGAAGCTT       |                    |           |
| <i>Borrelia lusitaniae</i>       | rpoB          | Forward  | CGAAGTACTCATAAAAGGCGTC           | 87                 | [20]      |
|                                  |               | Reverse  | TGGACGTCTTACTTCAAATCC            |                    |           |
|                                  |               | Probe    | TTAATGCTCTCGGGCTGGGGGACT         |                    |           |
| <i>Borrelia spielmanii</i>       | fla           | Forward  | ATCTATTTTCTGGTGAGGGAGC           | 71                 | [20]      |
|                                  |               | Reverse  | TCCTTCTGTGAGCACCTTC              |                    |           |
|                                  |               | Probe    | TTGAACAGGCGCAGTCTGAGCAGCTT       |                    |           |
| <i>Borrelia bissettii</i>        | rpoB          | Forward  | GCAACCAGTCAGCTTTCACAG            | 87                 | [20]      |
|                                  |               | Reverse  | CAAATCCTGCCCTATCCCTTG            |                    |           |
|                                  |               | Probe    | AAAGTCTCCCGGCCAAGAGCATTAA        |                    |           |
| <i>Borrelia miyamotoi</i>        | glpQ          | Forward  | CACGACCCAGAAATTGACACA            | 94                 | [20]      |
|                                  |               | Reverse  | GTGTGAAGTCAGTGGCGTAAT            |                    |           |
|                                  |               | Probe    | TCGTCCGTTTTCTCTAGCTCGATTGGG      |                    |           |
| <i>Borrelia</i> spp.             | 23S           | Forward  | GAGTCTTAAAGGGCGATTTAGT           | 73                 | [20]      |
|                                  |               | Reverse  | CTTCAGCTGGCCATAAATAG             |                    |           |
|                                  |               | Probe    | AGATGTGGTAGACCCGAAGCCGAGT        |                    |           |
| <i>Anaplasma marginale</i>       | msp1          | Forward  | CAGGCTTCAAGCGTACAGTG             | 85                 | [20]      |
|                                  |               | Reverse  | GATATCTGTGCTGGCCTTC              |                    |           |
|                                  |               | Probe    | ATGAAAGCCTGGAGATGTTAGACCGAG      |                    |           |
| <i>Anaplasma platys</i>          | groEL         | Forward  | TTCTGCCGATCCTTGAAAACG            | 75                 | [20]      |
|                                  |               | Reverse  | CTTCTCCTTCTACATCCTCAG            |                    |           |
|                                  |               | Probe    | TTGCTAGATCCGGCAGGCTCTGC          |                    |           |
| <i>Anaplasma phagocytophilum</i> | msp2          | Forward  | GCTATGGAAGGCAAGTGTGG             | 77                 | [20]      |
|                                  |               | Reverse  | GTCTTGAAGCGCTCGTAACC             |                    |           |
|                                  |               | Probe    | AATCTCAAGCTCAACCCTGGCACCAC       |                    |           |
| <i>Anaplasma centrale</i>        | groEL         | Forward  | AGCTGCCTGCTATACACG               | 79                 | [20]      |
|                                  |               | Reverse  | GATGTTGATGCCAATTGCTC             |                    |           |
|                                  |               | Probe    | CTTGATCTCTAGACGAGGTAAGGGG        |                    |           |
| <i>Anaplasma bovis</i>           | groEL         | Forward  | GGGAGATAGTACACATCCTTG            | 73                 | [22]      |
|                                  |               | Reverse  | CTGATAGCTACAGTTAAGCCC            |                    |           |
|                                  |               | Probe    | AGGTGCTGTTGGATGTAAGTCTGGACC      |                    |           |
| <i>Anaplasma</i> spp.            | 16S           | Forward  | CTTAGGGTTGTAAGTCTTTTACG          | 160                | [22]      |
|                                  |               | Reverse  | CTTTAACTACCAACCGCCTAC            |                    |           |
|                                  |               | Probe    | ATGCCCTTACGCCAATAATTCCGAACA      |                    |           |
| <i>Ehrlichia</i> spp.            | 16S           | Forward  | GCAACGCGAAAACTTACCA              | 98                 | [22]      |
|                                  |               | Reverse  | AGCCATGCAGCACCTGTGT              |                    |           |
|                                  |               | Probe    | AAGGTCCAGCCAACTGACTCTTCCG        |                    |           |
| <i>Ehrlichia canis</i>           | glfA          | Forward  | GACCAAGCAGTTGATAAAGATGG          | 136                | [22]      |
|                                  |               | Reverse  | CACATAAGACAATCCATGATTAGG         |                    |           |
|                                  |               | Probe    | ATTAAAACATCCTAAGATAGCAGTGGCTAAGG |                    |           |

(Continued)

771

| Targeted TBP                    | Targeted gene | Identity | Sequence                        | Amplicon size (bp) | Reference |
|---------------------------------|---------------|----------|---------------------------------|--------------------|-----------|
| <i>Neoehrlichia mikurensis</i>  | groEL         | Forward  | AGAGACATCATTTCGCATTTTGGGA       | 96                 | [20]      |
|                                 |               | Reverse  | TTCCGGGTACCATAAGGCTT            |                    |           |
|                                 |               | Probe    | AGATGCTGTTGGATGTAAGTCTGGACC     |                    |           |
| <i>Rickettsia conorii</i>       | 23S-5S ITS    | Forward  | CTCACAAAGTTATCAGGTTAAATAG       | 118                | [20]      |
|                                 |               | Reverse  | CGATACTCAGCAAATAATTCTCG         |                    |           |
|                                 |               | Probe    | CTGGATATCGTGGCAGGGCTACAGTAT     |                    |           |
| <i>Rickettsia slovaca</i>       | 23S-5S ITS    | Forward  | GTATCTACTCACAAAGTTATCAGG        | 138                | [20]      |
|                                 |               | Reverse  | CTTAACTTTTACTACAATACTCAGC       |                    |           |
|                                 |               | Probe    | TAATTTTCGCTGGATATCGTGGCAGGG     |                    |           |
| <i>Rickettsia massiliae</i>     | 23S-5S ITS    | Forward  | GTTATTGCATCACTAATGTTATACTG      | 128                | [20]      |
|                                 |               | Reverse  | GTTAATGTTGTTGCACGACTCAA         |                    |           |
|                                 |               | Probe    | TAGCCCCGCCACGATATCTAGCAAAAA     |                    |           |
| <i>Rickettsia helvetica</i>     | 23S-5S ITS    | Forward  | AGAACCGTAGCGTACACTTAG           | 79                 | [20]      |
|                                 |               | Reverse  | GAAAACCTACTTCTAGGGGT            |                    |           |
|                                 |               | Probe    | TACGTGAGGATTTGAGTACCGGATCGA     |                    |           |
| <i>Rickettsia aeschlimannii</i> | ITS           | Forward  | CTCACAAAGTTATCAGGTTAAATAG       | 134                | [20]      |
|                                 |               | Reverse  | CTTAACTTTTACTACGATACTTAGCA      |                    |           |
|                                 |               | Probe    | TAATTTTGTCTGGATATCGTGGCGGGG     |                    |           |
| <i>Rickettsia felis</i>         | orfB          | Forward  | ACCCTTTTCGTAACGCTTTGC           | 163                | [22]      |
|                                 |               | Reverse  | TATACTTAATGCTGGGCTAAACC         |                    |           |
|                                 |               | Probe    | AGGGAAACCTGGACTCCATATTCAAAAGAG  |                    |           |
| <i>Rickettsia</i> spp.          | gltA          | Forward  | GTCGCAAATGTTACGCTACTT           | 78                 | [22]      |
|                                 |               | Reverse  | TCTTCGTGCATTTCTTTCCATTG         |                    |           |
|                                 |               | Probe    | TGCAATAGCAAGAACCCTAGGCTGGATG    |                    |           |
| <i>Bartonella henselae</i>      | pap31         | Forward  | CCGCTGATCGCATTATGCCT            | 107                | [20]      |
|                                 |               | Reverse  | AGCGATTTCTGCATCATCTGCT          |                    |           |
|                                 |               | Probe    | ATGTTGCTGGTGGTGTTCCTATGCAC      |                    |           |
| <i>Bartonella</i> spp.          | ssrA          | Forward  | CGTTATCGGGCTAAATGAGTAG          | 118                | [22]      |
|                                 |               | Reverse  | ACCCCGCTTAAACCTGCGA             |                    |           |
|                                 |               | Probe    | TTGCAAATGACAACATATGCGGAAGCACGTC |                    |           |
| <i>Francisella tularensis</i>   | tul4          | Forward  | ACCCACAAGGAAGTGAAGATTA          | 76                 | [20]      |
|                                 |               | Reverse  | GTAATTGGGAAGCTTGATCATG          |                    |           |
|                                 |               | Probe    | AATGGCAGGCTCCAGAAGTTCTAAGT      |                    |           |
|                                 | fopA          | Forward  | GGCAAATCTAGCAGGTCAAGC           | 91                 | [20]      |
|                                 |               | Reverse  | CAACACTTGCTTGAACATTTCTAG        |                    |           |
|                                 |               | Probe    | AACAGGTGCTTGGGATGTGGGTGGTG      |                    |           |
| <i>Coxiella burnetii</i>        | IS1111        | Forward  | TGGAGGAGCGAACCATTGGT            | 86                 | [20]      |
|                                 |               | Reverse  | CATACGGTTTGACGTGCTGC            |                    |           |
|                                 |               | Probe    | ATCGGACGTTTATGGGGATGGGTATCC     |                    |           |
|                                 | icd           | Forward  | AGGCCCGTCCGTTATTTTACG           | 74                 | [20]      |
|                                 |               | Reverse  | CGGAAAATCACCATATTCACCTT         |                    |           |
|                                 |               | Probe    | TTCAGGCGTTTTGACCGGGCTTGGC       |                    |           |
| <i>Apycomplexa</i>              | 18S           | Forward  | TGAACGAGGAATGCCTAGTATG          | 104                | [22]      |
|                                 |               | Reverse  | CACCGGATCACTCGATCGG             |                    |           |
|                                 |               | Probe    | TAGGAGCGACGGGCGGTGTGTAC         |                    |           |
| <i>Babesia microti</i>          | CCTeta        | Forward  | ACAATGGATTTTCCCAGCAAAA          | 145                | [20]      |
|                                 |               | Reverse  | GCGACATTTGCGCAACTTATATA         |                    |           |
|                                 |               | Probe    | TACTCTGGTGAATGAGCGTATGGGTA      |                    |           |
| <i>Babesia canis</i>            | hsp70         | Forward  | TCACTGTGCCTGCGTACTTC            | 87                 | [20]      |
|                                 |               | Reverse  | TGATACGCATGACGTTGAGAC           |                    |           |
|                                 |               | Probe    | AACGACTCCCAGCGCCAGGCCAC         |                    |           |

(Continued)

| Targeted TBP                       | Targeted gene | Identity                    | Sequence                                                                             | Amplicon size (bp) | Reference |
|------------------------------------|---------------|-----------------------------|--------------------------------------------------------------------------------------|--------------------|-----------|
| <i>Babesia ovis</i>                | 18S           | Forward<br>Reverse<br>Probe | TCTGTGATGCCCTTAGATGTC<br>GCTGGTTACCCGCGCCTT<br>TCGGAGCGGGGTCAACTCGATGCAT             | 92                 | [20]      |
| <i>Babesia bovis</i>               | CCTeta        | Forward<br>Reverse<br>Probe | GCCAAGTAGTGGTAGACTGTA<br>GCTCCGTCATTGGTTATGGTA<br>TAAAGACAACACTGGGTCCGCGTGG          | 100                | [20]      |
| <i>Babesia caballi</i>             | rap1          | Forward<br>Reverse<br>Probe | GTTGTTCCGGCTGGGGCATC<br>CAGGCGACTGACGCTGTGT<br>TCTGTCCCAGATGTCAAGGGGCAGGT            | 94                 | [20]      |
| <i>Babesia venatorum</i> (sp. EU1) | 18S           | Forward<br>Reverse<br>Probe | GCGCGCTACTGATGCATT<br>CAAAAATCAATCCCCGTCACG<br>CATCGAGTTTAATCCTGTCCCGAAAGG           | 91                 | [20]      |
| <i>Babesia divergens</i>           | hsp70         | Forward<br>Reverse<br>Probe | GCGCGCTACTGATGCATT<br>CAAAAATCAATCCCCGTCACG<br>CATCGAGTTTAATCCTGTCCCGAAAGG           | 91                 | [20]      |
| <i>Theileria</i> spp.              | 18S           | Forward<br>Reverse<br>Probe | GTCAGTTTTTACGACTCCTTCAG<br>CCAAAGAATCAAGAAAGAGCTATC<br>AATCTGTCAATCCTTCTTTGTCTGGACC  | 213                | [20]      |
| <i>Hepatozoon</i> spp.             | 18S           | Forward<br>Reverse<br>Probe | ATTGGCTTACCGTGGCAGTG<br>AAAGCATTTTAACTGCCTTGATTG<br>ACGGTTAACGGGGATTAGGGTTTCGAT      | 175                | [22]      |
| <i>Ixodes ricinus</i>              | ITS2          | Forward<br>Reverse<br>Probe | CGAAACTCGATGGAGACCTG<br>ATCTCCAACGCACCGACGT<br>TTGTGAAATCCCGTCGCACGTTGAAC            | 77                 | [20]      |
| Tick spp                           | 16S           | Forward<br>Reverse<br>Probe | AAATACTCTAGGGATAACAGCGT<br>TCTTCATCAACAAGTATCCTAATC<br>CAACATCGAGGTCGCAAACATTTTGTCTA | 99                 | [22]      |
| <i>Dermacentor reticulatus</i>     | ITS2          | Forward<br>Reverse<br>Probe | AACCCTTTCCGCTCCGTG<br>TTTTGCTAGAGCTCGACGTAC<br>TAGGAAGGCAACAACGCAAACCTGCGA           | 83                 | [20]      |
| <i>Dermacentor marginatus</i>      | ITS2          | Forward<br>Reverse<br>Probe | GCACGTTGCGTTGTTTGCC<br>CCGCTCCGCGCAAGAATCT<br>TTCGGAGTACGTCGAGCTCTAGCAGA             | 139                | [20]      |
| <i>Escherichia coli</i>            | eae           | Forward<br>Reverse<br>Probe | CATTGATCAGGATTTTCTGGTGATA<br>CTCATGCGGAAATAGCCGTTA<br>ATAGTCTCGCAGTATTCGCCACCAATACC  | 102                | [20]      |

773 **Table S2.**

| Targeted genus                    | Targeted gene | Name            | Sequence                      | Reference |
|-----------------------------------|---------------|-----------------|-------------------------------|-----------|
| Babesia; Theileria;<br>Hepatozoon | 18s rRNA gene | BTH 18S 1st F   | GTGAAACTGCGAATGGCTCATTAC      | [81]      |
|                                   |               | BTH 18S 1st R   | AAGTGATAAGGTTACAAAACTTCCC     |           |
|                                   |               | BTH 18S 2nd F   | GGCTCATTACAACAGTTATAGTTTATTG  |           |
|                                   |               | BTH 18S 2nd R   | CGGTCCGAATAATTCACCGGAT        |           |
| Anaplasma; Ehrlichia              | 16s rRNA gene | EHR1            | GAACGAACGCTGGCGGCAAGC         | [82]      |
|                                   |               | EHR2            | AGTA(T/C)CG(A/G)ACCAGATAGCCGC |           |
|                                   |               | EHR3            | TGCATAGGAATCTACCTAGTAG        |           |
|                                   |               | EHR2            | AGTA(T/C)CG(A/G)ACCAGATAGCCGC |           |
| Borrelia                          | flaB          | FlaB280F        | GCAGTTCARTCAGGTAACGG          | [83]      |
|                                   |               | FlaRL           | GCAATCATAGCCATTGCAGATTGT      |           |
|                                   |               | flaB_737F       | GCATCAACTGTRGTTGTAACATTAACAGG |           |
|                                   |               | FlaLL           | ACATATTCAGATGCAGACAGAGGT      |           |
| Rickettsia                        | rompB         | Rc.rompB.4362p  | GTCAGCGTACTTCTTCGATGC         | [84]      |
|                                   |               | Rc.rompB.4,836n | CCGTACTCCATCTTAGCATCAG        |           |
|                                   |               | Rc.rompB.4,496p | CCAATGGCAGGACTTAGCTACT        |           |
|                                   |               | Rc.rompB.4,762n | AGGCTGGCTGATACACGGAGTAA       |           |
